# Supplementary material for: A sensitive MnO2 nanosheet sensing platform based on a fluorescence aptamer sensor for the detection of zearalenone
Source: Royal Society of Chemistry journal article supplement (doi:10.1039/d2ay01589g), 2022-01-01
Supplement: d2ay01589g1.pdf [file d2ay01589g1.pdf]

Supporting Information

**A sensitive MnO<sub>2</sub> nanosheet sensing platform based on a  
fluorescence aptamer sensor for the detection of  
zearalenone**

Guoxin Qin, Yuanwen Wei, Qifeng Zhou, Haijun Wang, Yuning Wei, Shuibing  
Lao, Lihong Luo, Renfu Mo, Yongxian Chen, Yuxia Yang, Jie He\* and  
Huiling Li\*

*Institute for Agricultural Product Quality Safety and Testing Technology,  
Guangxi Academy of Agricultural Sciences, Nanning 530007, China.*

\* *E-mail: herb312@126.com; lhl5040@163.com*

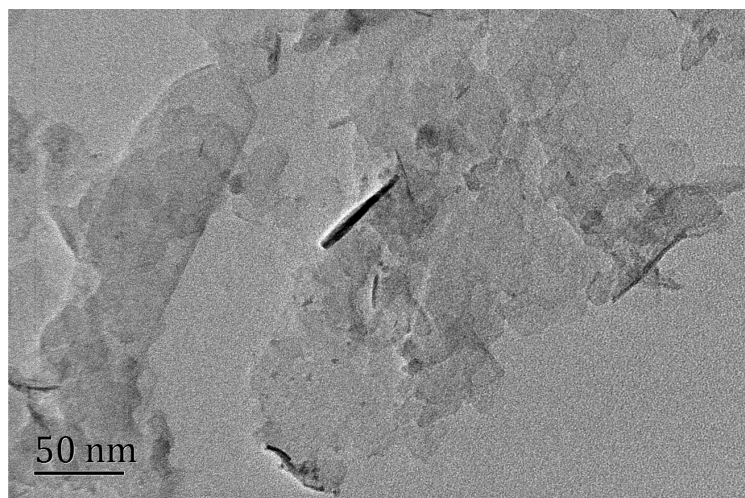

**Figure S1.** TEM image of the used MnO<sub>2</sub> nanosheet.

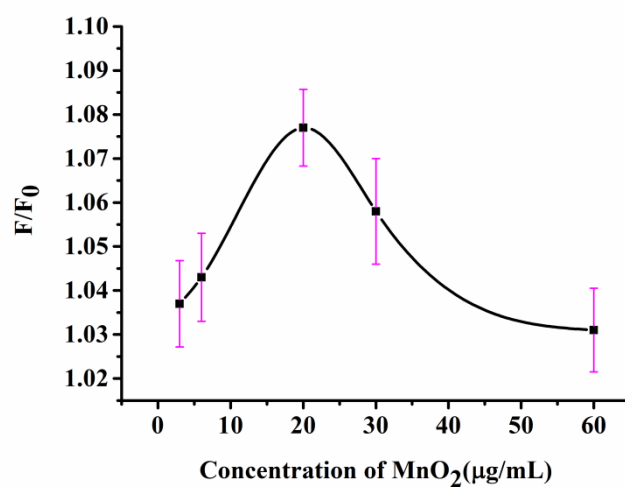

**Figure S2.** Effects of the amount of MnO<sub>2</sub> on FL intensity. Other experimental conditions were the same as those given in Figure 3.

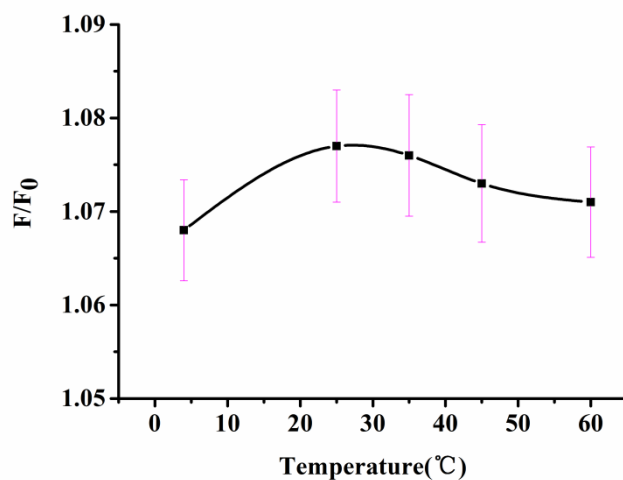

**Figure S3.** Effects of the binding temperature of 6-FAM-ZEN aptamer to  $\text{MnO}_2$  nanosheet on FL intensity. Other experimental conditions were the same as those given in Figure 3.

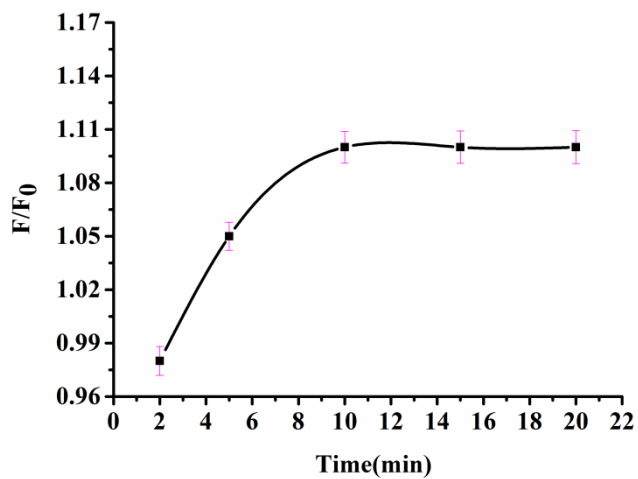

**Figure S4.** The effect of the binding time of 6-FAM-ZEN aptamer to  $\text{MnO}_2$  nanosheet on the FL quenching. Other experimental conditions were the same as those given in Figure 3.

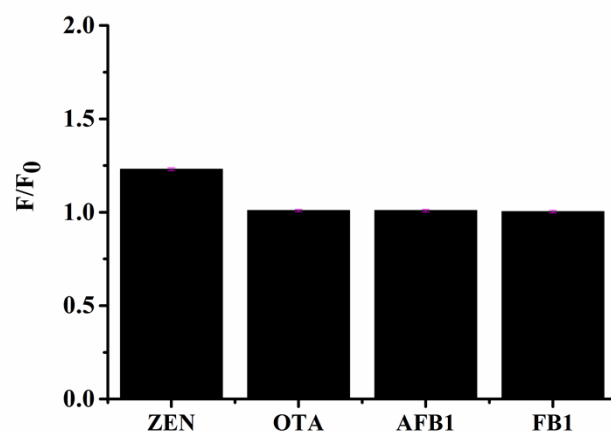

**Figure S5.** Detection specificity of the proposed FL aptamer sensor. Other experimental conditions were the same as those given in Figure 3.

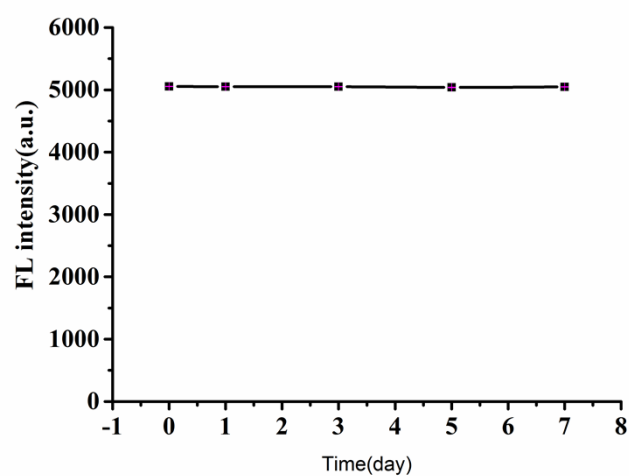

**Figure S6.** The stability of the G-Quadruplex/ZEN. Other experimental conditions were the same as those given in Figure 3.

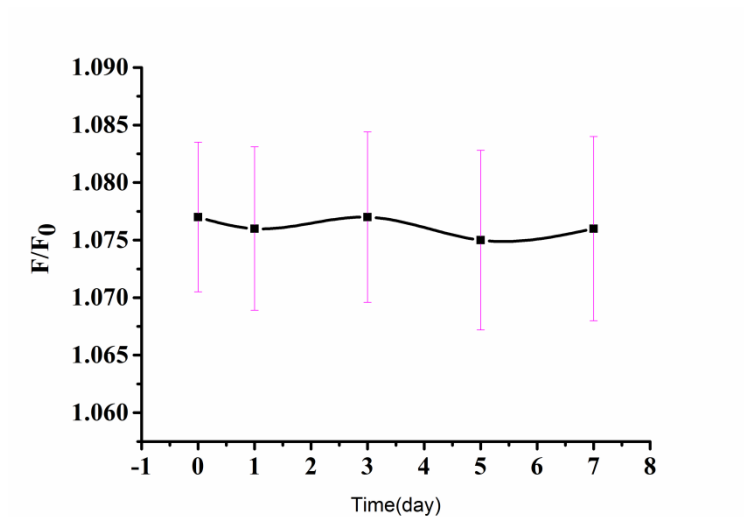

**Figure S7.** The durability of the FL aptamer sensor. Other experimental conditions were the same as those given in Figure 3.
